# Supplementary material
Source: PubMed Central journal article supplement (PMC3039280)
Supplement: NIHMS267520-supplement-Supplemental_Data.pdf [file NIHMS267520-supplement-Supplemental_Data.pdf]

## Supplementary Materials

### Multiple Novel Loci are Associated with Indices of Renal Function and Chronic Kidney Disease

Anna Köttgen\* (1), Nicole L Glazer\* (2), Abbas Dehghan\* (3, 24), Shih-Jen Hwang\* (4), Ronit Katz (5), Man Li (1), Qiong Yang (6); AGES: Vilmundur Gudnason (19, 20), Lenore J Launer (21), Tamara B Harris (21), Albert V Smith (19); ARIC: Dan E Arking (7), Brad C Astor (1), Eric Boerwinkle (8), Georg B Ehret (7, 23), Ingo Ruczinski (9), Robert B Scharpf (9); CHS: Yii-Der Ida Chen (10), Ian H de Boer (11), Talin Haritunians (10), Thomas Lumley (5), Mark Sarnak (12), David Siscovick (13); FHS: Emelia J Benjamin (14), Daniel Levy (4), Ashish Upadhyay (15); RS: Yurii S Aulchenko (3), Albert Hofman (3), Fernando Rivadeneira (16), André G Uitterlinden (16), Cornelia M van Duijn (3); WGHs: Daniel I Chasman (22), Guillaume Paré (22), Paul M Ridker (22); WH Linda Kao (1), Jacqueline C Witteman\*\* (3, 24), Josef Coresh\*\* (1, 9), Michael G Shlipak\*\* (17), Caroline S Fox\*\* (4, 18)

\*These authors have contributed equally to this work

\*\*Corresponding authors jointly contributed to this work

#### Author Affiliations:

- 1) Department of Epidemiology, Johns Hopkins University, Baltimore, MD, USA
- 2) Cardiovascular Health Research Unit and Department of Medicine, University of Washington, Seattle, WA, USA
- 3) Department of Epidemiology, Erasmus Medical Center, Rotterdam, The Netherlands
- 4) NHLBI's Framingham Heart Study and the Center for Population Studies, Framingham, MA, USA
- 5) Department of Biostatistics, University of Washington, Seattle, WA, USA
- 6) Department of Biostatistics, Boston University, Boston, MA, USA
- 7) McKusick-Nathans Institute of Genetic Medicine, Johns Hopkins Medical Institutions, Baltimore, MD, USA
- 8) Human Genetics Center and Division of Epidemiology, University of Texas Health Science Center at Houston, Houston, TX, USA
- 9) Department of Biostatistics, Johns Hopkins University, Baltimore, MD, USA
- 10) Medical Genetics Institute, Cedars-Sinai Medical Center, Los Angeles, CA, USA
- 11) Division of Nephrology, Department of Medicine, University of Washington, Seattle, WA, USA
- 12) Tufts-New England Medical Center, Boston, MA, USA
- 13) Departments of Medicine and Epidemiology, Cardiovascular Health Research Unit, University of Washington, Seattle, WA, USA
- 14) Boston University Schools of Medicine and Public Health, Boston, MA, USA
- 15) Renal Section, Boston Medical Center and Boston University School of Medicine, Boston, MA, USA
- 16) Department of Internal Medicine, Erasmus Medical Center, Rotterdam, The Netherlands
- 17) General Internal Medicine Division; San Francisco VA Medical Center; University of California, San Francisco, CA, USA

- 18) Brigham and Women's Hospital Division of Endocrinology and Harvard Medical School, Boston, MA, USA
- 19) Icelandic Heart Association Research Institute, Kopavogur, Iceland
- 20) University of Iceland, Reykjavik, Iceland
- 21) Laboratory of Epidemiology, Demography, and Biometry, Intramural Research Program, National Institute on Aging
- 22) Division of Preventive Medicine, Brigham and Women's Hospital, Boston, MA, USA
- 23) Division of Cardiology, Geneva University Hospital, Switzerland
- 24) Member of the Netherlands Consortium on Healthy Aging (NCHA)

**Correspondence:**

Caroline S. Fox, MD, MPH

Address: National Heart, Lung, and Blood Institute's Framingham Heart Study  
73 Mt Wayte Ave, Suite 2, Framingham, MA 01702, USA

Phone: +1 (508) 935-3447

Fax: +1 (508) 626-1262

Email: [foxca@nhlbi.nih.gov](mailto:foxca@nhlbi.nih.gov)

Jacqueline C. Witteman, PhD

Department of Epidemiology & Biostatistics, Erasmus Medical Center, Rotterdam  
P.O. Box 2040, 3000 CA Rotterdam, The Netherlands

Phone: +31 10-70 43489

Fax: +31 10-70 44657

E-mail: [j.witteman@erasmusmc.nl](mailto:j.witteman@erasmusmc.nl)

Josef Coresh, MD, PhD

Address: Welch Center for Prevention, Epidemiology & Clinical Research, 2024 E. Monument St., Baltimore, MD 21287, USA

Phone: +1 (410) 955-0495

Fax: +1 (410) 955-0476

E-mail: [coresh@jhu.edu](mailto:coresh@jhu.edu)

Michael G. Shlipak, MD, MPH

Address: General Internal Medicine Section, Veterans Affairs Medical Center (111A1), 4150 Clement St., San Francisco, CA 94121, USA

Phone: +1 (415) 750-2093

Fax: +1 (415) 379-5573

E-mail: [michael.shlipak@ucsf.edu](mailto:michael.shlipak@ucsf.edu)

## **Supplementary Methods**

### **Discovery study samples, phenotypes, and genotyping**

#### **Atherosclerosis Risk in Communities Study (ARIC)**

From 1987-89, 15,792 mostly Caucasian and African American study participants aged 45-64 years were recruited by probability sampling and underwent the baseline examination (visit 1) and three subsequent examinations scheduled approximately every three years.<sup>1</sup> Participants were excluded from genotyping for non-consent (n=53) or self-reported race other than “black” or “white” (n=47). For this project, genotype data was available for 8,861 white participants. Of these, 734 samples were removed in data cleaning steps for sex mismatch, discordance with previously-genotyped markers, first-degree relative of an included individual, and genetic outlier based on allele sharing<sup>2</sup> and principal components analyses.<sup>3</sup> Finally, individuals were excluded for missing outcome or covariates (n=58).

The ARIC Study used a cumulative CKD case definition to maximize power and reduce misclassification. CKD cases were defined based on  $\text{eGFR}_{\text{crea}} < 60 \text{ ml/min/1.73m}^2$  at study visits 1, 2 or 4, when creatinine was measured. Individuals with CKD at an earlier study visit who reverted to being non-cases at a later visit were not counted as cases, unless they also had an ICD code for kidney disease listed on a hospital discharge record or death certificate which were collected from study inception in 1987 to January 1, 2005.<sup>4</sup> Incident CKD was defined as  $\text{eGFR}_{\text{crea}} < 60 \text{ ml/in/1.73m}^2$  at study visits 2 or 4 in individuals with  $\text{eGFR}_{\text{crea}} \geq 60 \text{ ml/in/1.73m}^2$  at study visit 1, or a kidney-disease specific ICD code on a hospital discharge record or death certificate as detailed previously.<sup>4</sup> The final study sample consisted of 8,069 individuals for the analyses of CKD, and 6,525 and 6,430 for the analyses of eGFR based on serum creatinine ( $\text{eGFR}_{\text{crea}}$ ), and serum cystatin C ( $\text{eGFR}_{\text{cys}}$ ). Cross-sectional  $\text{eGFR}_{\text{crea}}$  and

eGFRcys were analyzed at study visit 4, on average 9 years after baseline, when cystatin C measurements were available, to allow for a direct comparison of eGFRcys and eGFRcrea measures. The difference in the sample size between the analyses for CKD and eGFRcrea therefore result from the different sample sizes at the baseline visit and visit 4. The association of CKD, eGFRcrea, and eGFRcys with the first 10 principle components was tested and not significant. Therefore, only genomic control adjustment was performed to account for population stratification.

In 2007-2008, genomic DNA was hybridized in accordance with the manufacturer's standard recommendations, and genotypes were determined using the Birdseed clustering algorithm. Individual samples were filtered to ensure high genotyping quality as outlined above. More information about selection criteria of SNPs for imputation and the imputation process is provided for all studies in Supplementary Table 1.

### **Cardiovascular Health Study (CHS)**

The original predominantly white CHS cohort of 5,201 persons was recruited in 1989-1990 from random samples of Medicare eligibility lists and an additional 687 African-Americans were enrolled in 1992-93 for a total sample of 5,888. CHS participants completed standardized clinical examinations and questionnaires at study baseline and at nine annual follow-up visits. Details of the study design are summarized elsewhere.<sup>5</sup> A total of 1,908 persons were not genotyped because of prevalent coronary heart disease, congestive heart failure, peripheral vascular disease, valvular heart disease, stroke or transient ischemic attack, or lack of available DNA. African American participants were excluded from this analysis of individuals of European ancestry. Individuals were also excluded if they had a call rate  $\leq 95\%$ , sex mismatch or discordance with prior genotyping. Further, individuals were excluded for

missing phenotypes at the baseline examination for a final study sample of 3,278 individuals in analyses of CKD and eGFR<sub>crea</sub>, and 2,844 in analyses of eGFR<sub>cys</sub>. A principle components analysis was performed using the singular value decomposition to determine the first 10 principal components in the CHS population,<sup>6</sup> which were then tested for association with the phenotypes of interest. None of the first ten principal components were associated with CKD or eGFR<sub>crea</sub>; therefore, only genomic control adjustment was performed to account for population stratification.

Blood samples were drawn on all participants at their baseline examination. DNA was extracted from blood, and genotyping was attempted in 2007-2008 in 3,397 white participants and was successful in 3,291 persons. More information about selection criteria of SNPs for imputation and the imputation process is provided for all studies in Supplementary Table 1.

### **The Framingham Heart Study (FHS)**

The Framingham Heart Study began in 1948 with the enrollment of the Original Cohort.<sup>7</sup> In 1971, 5,124 participants (the Offspring Cohort) were enrolled into the Framingham Offspring Study; the design and methodology have been previously described.<sup>8,9</sup> Study subjects consisted of original cohort participants attending examination cycle 15 (1977 to 1979) or cycle 24 (1995 to 1998) [n=2,338] and offspring cohort participants who attended the second examination cycle (1979 - 1983) or cycle 7 (1998-2001) [n=4,182]. Among these 6520 participants, 4140 had complete genotype data available. A variable indicating the cumulative prevalence of CKD was defined for participants with glomerular filtration rate (eGFR) <60 ml/min/1.73 m<sup>2</sup> at both the earlier examination cycle (15<sup>th</sup> for original and 2<sup>nd</sup> for offspring cohort) and later examination cycle (24<sup>th</sup> for original and 7<sup>th</sup> for offspring cohort) or diagnosed at the later examination cycles. The association of CKD with the first 10 principle components estimated from the genotype data

using the Eigenstrat program<sup>3</sup> was tested and not significant. Therefore, only genomic control adjustment was performed to account for population stratification.

Of the total 9,274 individuals that were genotyped in 2007, the following exclusions were made: sample call rate <97% (n=666), genotype heterozygosity greater than 5 standard deviations from the mean or ambiguous family data (n=127), resulting in 8,481 genotyped individuals. More information about selection criteria of SNPs for imputation and the imputation process is provided for all studies in Supplementary Table 1.

## **The Rotterdam Study (RS)**

### *Participants*

10,275 inhabitants of Ommoord, a district of Rotterdam in the Netherlands, who were 55 years or over, were invited to participate in this study of chronic diseases related to aging and 7,983 agreed to participate (78%).<sup>10, 11</sup> The baseline examination (1990-1993) was composed of a home interview and a visit to the research center for blood sampling and examination. Genotyping was conducted in 2007, and genotype data was available for 5,974 participants, subjects were excluded for excess autosomal heterozygosity, mismatch between called and phenotypic gender, or outliers identified by the identity by descent clustering analysis. The final sample for analysis in this study comprised 4,390 subjects with available phenotype and genotype data for the analyses of CKD and eGFR<sub>crea</sub>.

Plated DNA was available for 6,680 (93.7%) of 7,129 participants who visited the research center at baseline, clean genotype data was available for 5,974 individuals. More information about selection criteria of SNPs for imputation and the imputation process is provided for all studies in Supplementary Table 1.

## **Imputation in the discovery samples**

Using the Phase II CEU HapMap individuals as a reference panel, genotypes were imputed to a common set of ~2.5 million high-quality HapMap SNPs. Study-specific details on genotyping and imputation are provided in **Supplementary Table 1**. Software used for imputation were BimBam10 v0.95<sup>12</sup> (CHS) and MACH v1.0.15/16 (all others, <http://www.sph.umich.edu/csg/abecasis/MACH/>); FHS accounted for relatedness of participants. Imputed genotypes were expressed as an allelic dosage, a fractional value between 0-2.

### **Statistical analyses in the discovery samples**

Regression analyses were conducted as described in the Methods section. More specifically, eGFR in FHS was analyzed using linear mixed effects regression modeling to account for within pedigree correlation by using the kinship package in R. Association with CKD in FHS was evaluated using the gee package in R for generalized estimating equations; pedigree correlations were adjusted for using the robust variance option. Analyses in AGES were conducted using the most likely genotype for the imputed SNPs and the software package PLINK.<sup>2</sup> In WGHS, logistic regression analyses of CKD were conducted using R, and linear regression association testing was performed using PLINK. All studies used an additive genetic model.

Power calculations indicate that at a type I error level of  $4 \times 10^{-7}$  as used in discovery samples, we had >80% power to detect variants with an odds ratio for CKD of 1.3 and risk allele frequency >34%, or an odds ratio of 1.4 and risk allele frequency >14%.

The proportion of variance explained by the combined genetic loci was calculated in the ARIC Study, the largest individual study contributing data. The contribution of the top SNPs at all loci showing genome-wide significant association with eGFR<sub>crea</sub> after replication (*UMOD*, *SHROOM3*, *SPATA5L1/GATM*) to the eGFR<sub>crea</sub> variance was evaluated by adding these SNPs

to a regression model adjusting for age, sex, and study center. Similarly, the contribution of SNPs at the *CST*, *STC1*, and *UMOD* loci was evaluated for their contribution to the variance in eGFR<sub>cys</sub>.

Meta-analysis was conducted using a fixed effects model and inverse-variance weighting as implemented in METAL (<http://www.sph.umich.edu/csg/abecasis/Metal/index.html>). Regression coefficients were combined across samples; phenotypic harmonization was addressed by calibrating serum creatinine and applying uniform covariate adjustment across the study samples. The genomic control parameter<sup>13</sup> was calculated within each study for each trait to assess potential inflation of the test statistics. If the parameter was larger than 1, an adjustment was performed by scaling the test statistics to the inflation factor. Only SNPs with minor allele frequency (MAF)  $\geq 2\%$  were analyzed based on CKD case numbers, corresponding to approximately 50 carriers of the minor allele with CKD. Statistical heterogeneity was evaluated using Cochrane's chi-square test (Q-test).

## **External replication study samples, phenotypes, and genotyping**

### **Women's Genome Health Study (WGHS)**

The study population derived from the Women's Genome Health Study (WGHS).<sup>14</sup> Briefly, participants in the WGHS include American women from the Women's Health Study (WHS) with no prior history of cardiovascular disease, cancer, or other major chronic illness who also provided a baseline blood sample at the time of study enrollment from which genomic DNA was extracted. The original Women's Health Study was initiated in 1992 to evaluate risks and benefits of aspirin and vitamin E in cardiovascular disease and cancer prevention.<sup>15</sup> Individuals were excluded from analyses for genotyping call rates  $< 98\%$ , discrepancies from comparisons to previously obtained genotypes, and outliers identified by

clustering analyses, resulting in 18,333 individuals with available genotypes. Of these, 18,247 had information on both phenotype and genotype available.

Genotyping was conducted in 2007-2008 using HumanHap300 Duo-Plus chip or the combination of the HumanHap300 Duo and I-Select chips, resulting in a total of 363,808 SNPs. SNP exclusion criteria included SNP call rates <90%, deviation from Hardy-Weinberg equilibrium ( $p < 10^{-5}$ ), and SNPs with minor allele frequency <1% in Caucasians, resulting in 340,923 SNPs for analysis.

### **AGES Reykjavik Study**

The Reykjavik Study cohort originally comprised a random sample of men and women born in 1907–1935 and living in Reykjavik in 1967.<sup>16</sup> The study sample was divided into six groups by birth year and birth date within month. One group was designated for longitudinal follow-up and was examined in all stages. One group was designated a control group and was not included in examinations until 1991. Other groups were invited to participate in specific stages of the study. A total of 19,381 individuals still alive at the receipt of the study invitation responded, resulting in 71% recruitment rate over the period of 30 years. Between 2002 and 2006, the AGES-Reykjavik Study re-examined 5,764 survivors of the original cohort who had participated before in the Reykjavik Study. The AGES Reykjavik Study GWAS was approved by the National Bioethics Committee (00-063-V8+1) and the Data Protection Authority and MedStar IRB for the Intramural Program of the National Institute on Aging.

Samples were genotyped in 2008 using the Illumina 370CNV BeadChip array on 3,664 participants. Samples were excluded from the dataset based on sample failure, genotype mismatch with reference panel, and sex mismatch, resulting in clean genotype data on 3,219 individuals. Standard protocols for working with Illumina data were followed, with clustering

score greater than 0.4. Prior to genotype imputation, SNPs were excluded using filters based on call rate ( $<97\%$ ), Hardy-Weinberg Equilibrium ( $p < 10^{-6}$ ), mishap ( $p < 10^{-9}$ ), and mismatched positions between Illumina, dbSNP and/or HapMap resulting in 325,094 SNPs passing all QC (of 353,202 prior to cleaning steps). Imputation was done using MACH against all the HapMap CEPH haplotypes (release 22/NCBI build 36) resulting in 2,533,153 total SNPs for analysis.

### **Meta-analysis across discovery and replication samples**

Meta-analyses incorporating results from the external replication samples were also conducted using a fixed effects model and inverse-variance weighting.

### **Additional analyses**

The expression of the gene products in human kidney was evaluated using the UCSC Genome Browser (<http://genome.ucsc.edu/cgi-bin/hgGateway>) and the Gene Expression Atlas (<http://expression.gnf.org/cgi-bin/index.cgi>). Public databases were searched to evaluate the association between top SNPs and gene expression.<sup>17, 18</sup>

### **References**

1. The Atherosclerosis Risk in Communities (ARIC) Study: design and objectives. The ARIC investigators. *Am. J. Epidemiol.* **129**, 687-702 (1989).
2. Purcell, S. *et al.* PLINK: a tool set for whole-genome association and population-based linkage analyses. *Am. J. Hum. Genet.* **81**, 559-575 (2007).
3. Price, A. L. *et al.* Principal components analysis corrects for stratification in genome-wide association studies. *Nat. Genet.* **38**, 904-909 (2006).
4. Hsu, C. C. *et al.* Apolipoprotein E and progression of chronic kidney disease. *JAMA* **293**, 2892-2899 (2005).
5. Fried, L. P. *et al.* The Cardiovascular Health Study: design and rationale. *Ann. Epidemiol.* **1**, 263-276 (1991).

6. Johnson, R. A. & Wichern, D. W. in *Applied multivariate statistical analysis* (Upper Saddle River, N.J.: Pearson Prentice Hall, 2007).
7. DAWBER, T. R., KANNEL, W. B. & LYELL, L. P. An approach to longitudinal studies in a community: the Framingham Study. *Ann. N. Y. Acad. Sci.* **107**, 539-556 (1963).
8. Kannel, W. B., Feinleib, M., McNamara, P. M., Garrison, R. J. & Castelli, W. P. An investigation of coronary heart disease in families. The Framingham offspring study. *Am. J. Epidemiol.* **110**, 281-290 (1979).
9. Feinleib, M., Kannel, W. B., Garrison, R. J., McNamara, P. M. & Castelli, W. P. The Framingham Offspring Study. Design and preliminary data. *Prev. Med.* **4**, 518-525 (1975).
10. Hofman, A., Grobbee, D. E., de Jong, P. T. & van den Ouweland, F. A. Determinants of disease and disability in the elderly: the Rotterdam Elderly Study. *Eur. J. Epidemiol.* **7**, 403-422 (1991).
11. Hofman, A. *et al.* The Rotterdam Study: objectives and design update. *Eur. J. Epidemiol.* **22**, 819-829 (2007).
12. Servin, B. & Stephens, M. Imputation-based analysis of association studies: candidate regions and quantitative traits. *PLoS Genet.* **3**, e114 (2007).
13. Devlin, B. & Roeder, K. Genomic control for association studies. *Biometrics* **55**, 997-1004 (1999).
14. Ridker, P. M. *et al.* Rationale, design, and methodology of the Women's Genome Health Study: a genome-wide association study of more than 25,000 initially healthy american women. *Clin. Chem.* **54**, 249-255 (2008).
15. Ridker, P. M. *et al.* A randomized trial of low-dose aspirin in the primary prevention of cardiovascular disease in women. *N. Engl. J. Med.* **352**, 1293-1304 (2005).
16. Harris, T. B. *et al.* Age, Gene/Environment Susceptibility-Reykjavik Study: multidisciplinary applied phenomics. *Am. J. Epidemiol.* **165**, 1076-1087 (2007).
17. Dixon, A. L. *et al.* A genome-wide association study of global gene expression. *Nat. Genet.* **39**, 1202-1207 (2007).
18. Ge, D. *et al.* WGAViewer: software for genomic annotation of whole genome association studies. *Genome Res.* **18**, 640-643 (2008).

## Supplementary Tables

| <b>Supplementary Table 1: Study-specific genotyping and imputation information</b>                                        |                                                           |                                                                         |                                                                                                                                   |                                                           |
|---------------------------------------------------------------------------------------------------------------------------|-----------------------------------------------------------|-------------------------------------------------------------------------|-----------------------------------------------------------------------------------------------------------------------------------|-----------------------------------------------------------|
| <b>Study</b>                                                                                                              | <b>ARIC</b>                                               | <b>CHS</b>                                                              | <b>FHS</b>                                                                                                                        | <b>Rotterdam</b>                                          |
| <b>Array type(s)</b>                                                                                                      | Affymetrix 6.0                                            | Illumina 370CNV                                                         | Affymetrix 500K,<br>Affymetrix 50K<br>supplemental                                                                                | Illumina 550K                                             |
| <b>Genotype calling</b>                                                                                                   | Birdseed                                                  | Illumina BeadStudio                                                     | BRLMM                                                                                                                             | Illumina Beadstudio                                       |
| <b>QC filters for genotyped SNPs used for imputation</b>                                                                  | call rate <95%,<br>MAF<1%,<br>pHWE<10E-5                  | call rate <97%,<br>heterozygotes=0,<br>pHWE<10E-5, SNP not in<br>HapMap | call rate <95%,<br>pHWE<10E-6                                                                                                     | call rate <90%,<br>MAF<1%, pHWE<10E-5                     |
| <b>No of SNPs used for imputation</b>                                                                                     | 602,642                                                   | 306,655                                                                 | 503,526                                                                                                                           | 530,683                                                   |
| <b>Imputation</b>                                                                                                         | MACH version 1.0.16                                       | BimBam                                                                  | MACH version 1.0.15                                                                                                               | MACH version 1.0.15                                       |
| <b>Imputation Backbone (NCBI build)</b>                                                                                   | phased CEU<br>haplotypes, HapMap<br>release 21 (build 35) | HapMap CEU release<br>21A, build 36                                     | phased CEU haplotypes,<br>HapMap release 22 (build<br>36)                                                                         | phased CEU haplotypes,<br>HapMap release 22<br>(build 36) |
| <b>Filtering of imputed genotypes</b>                                                                                     | none                                                      | dosage variance < 0.01                                                  | none                                                                                                                              | none                                                      |
| <b>Data management and statistical analysis</b>                                                                           | ProbABEL, PLINK, R                                        | R                                                                       | R, lmekin function in<br>Kinship package for<br>continuous traits and<br>gee function in GEE<br>package for dichotomous<br>traits | ProbABEL, R                                               |
| Further details on association testing in FHS and in the replication samples are provided in the Supplementary Materials. |                                                           |                                                                         |                                                                                                                                   |                                                           |

| <b>Supplementary Table 2: Characteristics of CKD cases among the discovery cohorts</b> |                      |                      |                      |                      |
|----------------------------------------------------------------------------------------|----------------------|----------------------|----------------------|----------------------|
|                                                                                        | <b>ARIC</b>          | <b>CHS</b>           | <b>FHS</b>           | <b>RS</b>            |
| <b>Number of cases</b>                                                                 | 731                  | 612                  | 445                  | 600                  |
| <b>Age, years</b>                                                                      | 63.4 (6.5)           | 74.3 (6.1)           | 69.9 (10.4)          | 77.6 (8.5)           |
| <b>Diabetes</b>                                                                        | 19.3 (141)           | 13.1 (80)            | 15.0 (67)            | 20.0 (120)           |
| <b>Hypertension</b>                                                                    | 68.8 (503)           | 64.2 (389)           | 75.3 (335)           | 46.2 (277)           |
| <b>eGFR<sub>crea</sub>, ml/min/1.73m<sup>2</sup>,<br/>median (IQR)</b>                 | 55.1<br>(50.2, 57.3) | 53.4<br>(47.7, 58.3) | 50.9<br>(44.6, 55.8) | 53.8<br>(47.8, 57.4) |

Information on demographics, hypertension, and diabetes are ascertained at the same visit as CKD. Abbreviations: eGFR: estimated glomerular filtration rate, IQR: interquartile range. Continuous variables are presented as mean (standard deviation), and categorical variables as % (n), unless indicated otherwise.

| Supplementary Table 3: Summary of study-specific results from discovery and validation of top GWAS signals at each locus ( $p < 4 \times 10^{-7}$ ) for CKD, eGFR <sub>crea</sub> , and eGFR <sub>cys</sub> |                         |                      |                      |                  |                      |                       |                  |
|-------------------------------------------------------------------------------------------------------------------------------------------------------------------------------------------------------------|-------------------------|----------------------|----------------------|------------------|----------------------|-----------------------|------------------|
| traits                                                                                                                                                                                                      | meta-analysis 6 cohorts | ARIC                 | CHS                  | FHS              | RS                   | AGES                  | WGHS             |
| <i>rs12917707 in the UMOD region, chr16: 20275191</i>                                                                                                                                                       |                         |                      |                      |                  |                      |                       |                  |
| <b>CKD</b>                                                                                                                                                                                                  |                         |                      |                      |                  |                      |                       |                  |
| p-value                                                                                                                                                                                                     | 2.27*10 <sup>-12</sup>  | 3.4*10 <sup>-5</sup> | 3.9*10 <sup>-5</sup> | 0.74             | 1.4*10 <sup>-4</sup> | 1.6*10 <sup>-6</sup>  | 0.20             |
| OR (95% CI)                                                                                                                                                                                                 | 0.80 (0.75-0.85)        | 0.72 (0.61-0.84)     | 0.68 (0.56-0.82)     | 0.97 (0.82-1.15) | 0.71 (0.59-0.85)     | 0.68 (0.58-0.79)      | 0.93 (0.83-1.04) |
| <b>eGFR<sub>crea</sub></b>                                                                                                                                                                                  |                         |                      |                      |                  |                      |                       |                  |
| p-value                                                                                                                                                                                                     | 5.2*10 <sup>-16</sup>   | 1.2*10 <sup>-5</sup> | 5.3*10 <sup>-7</sup> | 0.37             | 3.1*10 <sup>-6</sup> | 4.0*10 <sup>-10</sup> | 0.004            |
| beta (se)                                                                                                                                                                                                   | 0.018 (0.002)           | 0.022 (0.005)        | 0.044 (0.009)        | -0.007 (0.007)   | 0.028 (0.006)        | 0.055 (0.009)         | 0.009 (0.003)    |
| <b>eGFR<sub>cys</sub>*</b>                                                                                                                                                                                  |                         |                      |                      |                  |                      |                       |                  |
| p-value                                                                                                                                                                                                     | 2.0*10 <sup>-7</sup>    | 3.8*10 <sup>-4</sup> | 9.2*10 <sup>-6</sup> | 0.21             | NA                   | NA                    | NA               |
| beta (se)                                                                                                                                                                                                   | 0.021 (0.004)           | 0.022 (0.006)        | 0.034 (0.008)        | 0.008 (0.007)    | NA                   | NA                    | NA               |
| <i>rs6040055 in JAG1, chr20:10581313</i>                                                                                                                                                                    |                         |                      |                      |                  |                      |                       |                  |
| <b>CKD</b>                                                                                                                                                                                                  |                         |                      |                      |                  |                      |                       |                  |
| p-value                                                                                                                                                                                                     | 0.006                   | 1.4*10 <sup>-5</sup> | 0.02                 | 0.83             | 0.012                | 0.38                  | 0.54             |
| OR (95% CI)                                                                                                                                                                                                 | 1.07 (1.02-1.13)        | 1.37 (1.19-1.57)     | 1.17 (1.03-1.33)     | 1.02 (0.84-1.25) | 1.20 (1.04-1.37)     | 0.95 (0.84-1.07)      | 0.97 (0.89-1.06) |
| <b>eGFR<sub>crea</sub></b>                                                                                                                                                                                  |                         |                      |                      |                  |                      |                       |                  |
| p-value                                                                                                                                                                                                     | 0.006                   | 1.1*10 <sup>-5</sup> | 6.4*10 <sup>-3</sup> | 0.25             | 5.8*10 <sup>-3</sup> | 0.24                  | 0.40             |
| beta (se)                                                                                                                                                                                                   | -0.005 (0.002)          | -0.021 (0.005)       | -0.019 (0.007)       | -0.009 (0.008)   | -0.013 (0.005)       | 0.009 (0.007)         | 0.002 (0.003)    |
| <b>eGFR<sub>cys</sub>*</b>                                                                                                                                                                                  |                         |                      |                      |                  |                      |                       |                  |
| p-value                                                                                                                                                                                                     | 4.0*10 <sup>-6</sup>    | 8.0*10 <sup>-4</sup> | 2.0*10 <sup>-3</sup> | 0.20             | NA                   | NA                    | NA               |
| beta (se)                                                                                                                                                                                                   | -0.017 (0.004)          | -0.020 (0.006)       | -0.020 (0.006)       | -0.010 (0.008)   | NA                   | NA                    | NA               |
| <i>rs17319721 in SHROOM3, chr4:77587871</i>                                                                                                                                                                 |                         |                      |                      |                  |                      |                       |                  |
| <b>CKD</b>                                                                                                                                                                                                  |                         |                      |                      |                  |                      |                       |                  |
| p-value                                                                                                                                                                                                     | 0.057                   | 0.12                 | 0.58                 | 0.16             | 0.14                 | 0.99                  | 0.44             |
| OR (95% CI)                                                                                                                                                                                                 | 1.05 (1.00-1.10)        | 1.09 (0.98-1.22)     | 0.96 (0.82-1.11)     | 1.11 (0.96-1.29) | 1.10 (0.97-1.26)     | 1.0 (0.89-1.12)       | 1.04 (0.95-1.13) |

|                                                  |                       |                      |                      |                      |                      |                      |                      |
|--------------------------------------------------|-----------------------|----------------------|----------------------|----------------------|----------------------|----------------------|----------------------|
| <b>eGFRcrea</b>                                  |                       |                      |                      |                      |                      |                      |                      |
| p-value                                          | 1.2*10 <sup>-12</sup> | 2.7*10 <sup>-4</sup> | 0.25                 | 0.11                 | 3.2*10 <sup>-4</sup> | 0.13                 | 8.9*10 <sup>-6</sup> |
| beta (se)                                        | -0.012 (0.002)        | -0.014 (0.004)       | -0.009 (0.008)       | -0.009 (0.006)       | -0.017 (0.005)       | -0.011 (0.007)       | -0.011 (0.002)       |
| <b>eGFRcys*</b>                                  |                       |                      |                      |                      |                      |                      |                      |
| p-value                                          | 4.2*10 <sup>-5</sup>  | 7.6*10 <sup>-3</sup> | 0.022                | 0.027                | NA                   | NA                   | NA                   |
| beta (se)                                        | -0.013 (0.003)        | -0.012 (0.005)       | -0.016 (0.007)       | -0.012 (0.005)       | NA                   | NA                   | NA                   |
| <i>rs1731274 upstream of STC1, chr8:23822264</i> |                       |                      |                      |                      |                      |                      |                      |
| <b>CKD</b>                                       |                       |                      |                      |                      |                      |                      |                      |
| p-value                                          | 6.0*10 <sup>-2</sup>  | 0.95                 | 0.45                 | 0.02                 | 0.37                 | 0.59                 | 0.45                 |
| OR (95% CI)                                      | 1.05 (1.00-1.10)      | 1.00 (0.89-1.12)     | 1.05 (0.92-1.21)     | 1.22 (1.03-1.44)     | 1.06 (0.93-1.22)     | 1.03 (0.92-1.16)     | 1.03 (0.95-1.13)     |
| <b>eGFRcrea</b>                                  |                       |                      |                      |                      |                      |                      |                      |
| p-value                                          | 2.21*10 <sup>-7</sup> | 0.072                | 0.047                | 8.8*10 <sup>-5</sup> | 0.57                 | 0.088                | 0.002                |
| beta (se)                                        | -0.009 (0.002)        | -0.007 (0.004)       | -0.014 (0.007)       | -0.023 (0.006)       | -0.003 (0.005)       | -0.012 (0.007)       | -0.008 (0.002)       |
| <b>eGFRcys*</b>                                  |                       |                      |                      |                      |                      |                      |                      |
| p-value                                          | 4.6*10 <sup>-8</sup>  | 4.2*10 <sup>-3</sup> | 8.9*10 <sup>-5</sup> | 2.0*10 <sup>-3</sup> | NA                   | NA                   | NA                   |
| beta (se)                                        | -0.017 (0.003)        | -0.013 (0.005)       | -0.026 (0.007)       | -0.017 (0.005)       | NA                   | NA                   | NA                   |
| <i>rs2467853 in SPATA5L1, chr15:43486085</i>     |                       |                      |                      |                      |                      |                      |                      |
| <b>CKD</b>                                       |                       |                      |                      |                      |                      |                      |                      |
| p-value                                          | 7.6*10 <sup>-8</sup>  | 0.14                 | 0.003                | 0.07                 | 0.25                 | 0.0004               | 0.017                |
| OR (95% CI)                                      | 1.14 (1.09-1.20)      | 1.09 (0.97-1.22)     | 1.23 (1.07-1.41)     | 1.15 (0.99-1.34)     | 1.08 (0.95-1.24)     | 1.24 (1.10-1.40)     | 1.11 (1.02-1.21)     |
| <b>eGFRcrea</b>                                  |                       |                      |                      |                      |                      |                      |                      |
| p-value                                          | 6.2*10 <sup>-14</sup> | 3.0*10 <sup>-5</sup> | 3.3*10 <sup>-1</sup> | 9.3*10 <sup>-2</sup> | 9.3*10 <sup>-3</sup> | 2.1*10 <sup>-3</sup> | 2.4*10 <sup>-6</sup> |
| beta (se)                                        | -0.013 (0.002)        | -0.016 (0.004)       | -0.007 (0.008)       | -0.010 (0.006)       | -0.012 (0.005)       | -0.022 (0.007)       | -0.012 (0.003)       |
| <b>eGFRcys*</b>                                  |                       |                      |                      |                      |                      |                      |                      |
| p-value                                          | 0.95                  | 0.69                 | 0.71                 | 0.36                 | NA                   | NA                   | NA                   |
| beta (se)                                        | 0.000 (0.003)         | -0.002 (0.005)       | -0.003 (0.007)       | 0.005 (0.006)        | NA                   | NA                   | NA                   |
| <i>rs13038305 close to CST3, chr20:23558262</i>  |                       |                      |                      |                      |                      |                      |                      |
| <b>CKD</b>                                       |                       |                      |                      |                      |                      |                      |                      |
| p-value                                          | 0.18                  | 0.11                 | 0.29                 | 0.49                 | 0.60                 | NA                   | NA                   |
| OR (95% CI)                                      | 0.94 (0.87-1.03)      | 0.89 (0.77-1.03)     | 0.91 (0.76-1.09)     | 1.07 (0.89-1.29)     | 0.96 (0.82-1.13)     | NA                   | NA                   |







**Supplementary Table 6: SNPs associated with eGFR<sub>cys</sub> at  $p < 4 \times 10^{-7}$  in 12,266 CHARGE participants**

| SNP        | chr | position | gene | genes within 60 kb   | modeled allele | beta   | s.e.  | p value  | n      |
|------------|-----|----------|------|----------------------|----------------|--------|-------|----------|--------|
| rs13038305 | 20  | 23558262 |      | CST3;CST4;CST9       | t              | 0.076  | 0.004 | 2.17E-88 | 12,266 |
| rs6048956  | 20  | 23557301 |      | CST3;CST9L;CST4;CST9 | t              | 0.076  | 0.004 | 2.51E-88 | 12,266 |
| rs911119   | 20  | 23560737 |      | CST3;CST4;CST9       | t              | -0.076 | 0.004 | 2.76E-88 | 12,266 |
| rs6036478  | 20  | 23559359 |      | CST3;CST4;CST9       | a              | 0.076  | 0.004 | 2.91E-88 | 12,266 |
| rs1010117  | 20  | 23556421 |      | CST3;CST9L;CST4;CST9 | c              | 0.076  | 0.004 | 3.17E-88 | 12,266 |
| rs3827143  | 20  | 23567617 |      | CST3;CST4;CST9       | a              | -0.077 | 0.004 | 5.89E-88 | 12,266 |
| rs2424582  | 20  | 23570550 |      | CST3;CST4;CST9       | a              | -0.077 | 0.004 | 5.78E-87 | 12,266 |
| rs6036465  | 20  | 23536003 |      | CST3;CST9L;CST9      | t              | 0.072  | 0.004 | 6.00E-87 | 12,266 |
| rs8116859  | 20  | 23538703 |      | CST3;CST9L;CST9      | a              | -0.073 | 0.004 | 6.26E-87 | 12,266 |
| rs6048929  | 20  | 23536855 |      | CST3;CST9L;CST9      | t              | -0.072 | 0.004 | 6.92E-87 | 12,266 |
| rs6048930  | 20  | 23540492 |      | CST3;CST9L;CST9      | t              | -0.073 | 0.004 | 7.67E-87 | 12,266 |
| rs17751897 | 20  | 23540714 |      | CST3;CST9L;CST9      | t              | -0.073 | 0.004 | 8.76E-87 | 12,266 |
| rs6048952  | 20  | 23555257 |      | CST3;CST9L;CST4;CST9 | a              | -0.074 | 0.004 | 8.79E-87 | 12,266 |
| rs6114201  | 20  | 23555231 |      | CST3;CST9L;CST4;CST9 | a              | 0.073  | 0.004 | 9.66E-87 | 12,266 |
| rs12625716 | 20  | 23554845 |      | CST3;CST9L;CST4;CST9 | a              | 0.073  | 0.004 | 1.01E-86 | 12,266 |
| rs7265178  | 20  | 23551382 |      | CST3;CST9L;CST9      | c              | -0.073 | 0.004 | 1.08E-86 | 12,266 |
| rs13043266 | 20  | 23536127 |      | CST3;CST9L;CST9      | t              | 0.073  | 0.004 | 1.11E-86 | 12,266 |
| rs6036474  | 20  | 23552414 |      | CST3;CST9L;CST9      | a              | 0.073  | 0.004 | 1.11E-86 | 12,266 |
| rs8121283  | 20  | 23553002 |      | CST3;CST9L;CST9      | c              | 0.073  | 0.004 | 1.13E-86 | 12,266 |
| rs1011226  | 20  | 23553833 |      | CST3;CST9L;CST9      | a              | -0.073 | 0.004 | 1.18E-86 | 12,266 |
| rs6048928  | 20  | 23533988 | CST9 | CST3;CST9L;CST9      | t              | -0.073 | 0.004 | 1.27E-86 | 12,266 |
| rs13038337 | 20  | 23547918 |      | CST3;CST9L;CST9      | t              | -0.073 | 0.004 | 1.29E-86 | 12,266 |
| rs6048945  | 20  | 23550228 |      | CST3;CST9L;CST9      | t              | 0.074  | 0.004 | 1.66E-86 | 12,266 |
| rs8114619  | 20  | 23549813 |      | CST3;CST9L;CST9      | t              | 0.074  | 0.004 | 1.66E-86 | 12,266 |
| rs6048946  | 20  | 23550307 |      | CST3;CST9L;CST9      | t              | 0.074  | 0.004 | 1.66E-86 | 12,266 |
| rs8121147  | 20  | 23549708 |      | CST3;CST9L;CST9      | t              | -0.074 | 0.004 | 1.69E-86 | 12,266 |

|            |    |          |      |                 |   |        |       |          |        |
|------------|----|----------|------|-----------------|---|--------|-------|----------|--------|
| rs4815224  | 20 | 23542112 |      | CST3;CST9L;CST9 | c | 0.074  | 0.004 | 1.70E-86 | 12,266 |
| rs6048933  | 20 | 23543637 |      | CST3;CST9L;CST9 | t | -0.074 | 0.004 | 1.72E-86 | 12,266 |
| rs13043610 | 20 | 23534941 |      | CST3;CST9L;CST9 | a | 0.073  | 0.004 | 3.15E-86 | 12,266 |
| rs6114208  | 20 | 23569734 |      | CST3;CST4;CST9  | c | -0.077 | 0.004 | 4.22E-86 | 12,266 |
| rs13037490 | 20 | 23531725 | CST9 | CST3;CST9L;CST9 | t | -0.073 | 0.004 | 5.13E-86 | 12,266 |
| rs3004145  | 20 | 23530876 |      | CST3;CST9L;CST9 | c | 0.071  | 0.004 | 1.81E-85 | 12,266 |
| rs6515375  | 20 | 23558841 |      | CST3;CST4;CST9  | a | 0.078  | 0.004 | 8.24E-85 | 12,266 |
| rs6048926  | 20 | 23528987 |      | CST3;CST9L;CST9 | a | 0.071  | 0.004 | 8.66E-85 | 12,266 |
| rs2208289  | 20 | 23527526 |      | CST3;CST9L;CST9 | a | 0.071  | 0.004 | 1.34E-84 | 12,266 |
| rs6048924  | 20 | 23526996 |      | CST3;CST9L;CST9 | a | 0.071  | 0.004 | 3.00E-84 | 12,266 |
| rs6036463  | 20 | 23526940 |      | CST3;CST9L;CST9 | a | 0.071  | 0.004 | 4.87E-84 | 12,266 |
| rs3004139  | 20 | 23526674 |      | CST9;CST3;CST9L | t | -0.071 | 0.004 | 5.36E-84 | 12,266 |
| rs4815223  | 20 | 23525112 |      | CST3;CST9L;CST9 | a | 0.071  | 0.004 | 6.39E-84 | 12,266 |
| rs6036461  | 20 | 23524754 |      | CST3;CST9L;CST9 | c | 0.071  | 0.004 | 6.94E-84 | 12,266 |
| rs4815222  | 20 | 23524964 |      | CST3;CST9L;CST9 | a | 0.071  | 0.004 | 7.07E-84 | 12,266 |
| rs12710327 | 20 | 23517689 |      | CST3;CST9L;CST9 | t | 0.071  | 0.004 | 7.09E-84 | 12,266 |
| rs6048920  | 20 | 23524844 |      | CST3;CST9L;CST9 | t | -0.071 | 0.004 | 7.52E-84 | 12,266 |
| rs1158167  | 20 | 23526189 |      | CST3;CST9L;CST9 | a | -0.070 | 0.004 | 9.08E-84 | 12,266 |
| rs4346460  | 20 | 23517400 |      | CST3;CST9L;CST9 | t | 0.071  | 0.004 | 1.07E-83 | 12,266 |
| rs2405392  | 20 | 23517186 |      | CST3;CST9L;CST9 | t | 0.071  | 0.004 | 1.13E-83 | 12,266 |
| rs6048923  | 20 | 23526206 |      | CST3;CST9L;CST9 | t | 0.072  | 0.004 | 2.01E-83 | 12,266 |
| rs6036476  | 20 | 23558308 |      | CST3;CST4;CST9  | c | -0.074 | 0.004 | 1.98E-77 | 12,266 |
| rs6114214  | 20 | 23575924 |      | CST3;CST4;CST9  | a | -0.073 | 0.004 | 6.62E-66 | 12,266 |
| rs13037020 | 20 | 23577222 |      | CST3;CST4;CST9  | t | -0.070 | 0.004 | 7.43E-66 | 12,266 |
| rs13039144 | 20 | 23581755 |      | CST3;CST4;CST9  | a | -0.072 | 0.004 | 7.54E-66 | 12,266 |
| rs2145231  | 20 | 23573547 |      | CST3;CST4;CST9  | a | 0.070  | 0.004 | 3.55E-65 | 12,266 |
| rs2424591  | 20 | 23585093 |      | CST3;CST4;CST9  | t | -0.061 | 0.004 | 1.98E-46 | 12,266 |
| rs2424590  | 20 | 23584980 |      | CST3;CST4;CST9  | t | -0.061 | 0.004 | 3.01E-46 | 12,266 |
| rs3810575  | 20 | 23531392 | CST9 | CST3;CST9L;CST9 | a | 0.066  | 0.005 | 1.55E-41 | 5,836  |

|            |    |          |      |                      |   |        |       |          |        |
|------------|----|----------|------|----------------------|---|--------|-------|----------|--------|
| rs2983608  | 20 | 23590839 |      | CST3;CST4;CST9       | t | -0.051 | 0.004 | 1.12E-39 | 12,266 |
| rs3004153  | 20 | 23590458 |      | CST3;CST4;CST9       | a | 0.050  | 0.004 | 1.23E-39 | 12,266 |
| rs8184852  | 20 | 23591460 |      | CST3;CST4;CST9       | a | 0.050  | 0.004 | 1.35E-39 | 12,266 |
| rs3004154  | 20 | 23591605 |      | CST3;CST4;CST9       | a | 0.050  | 0.004 | 2.03E-39 | 12,266 |
| rs2424598  | 20 | 23596032 |      | CST3;CST4            | a | -0.050 | 0.004 | 8.61E-39 | 12,266 |
| rs1884861  | 20 | 23595482 |      | CST3;CST4            | c | -0.050 | 0.004 | 8.71E-39 | 12,266 |
| rs2226058  | 20 | 23620147 |      | CST1;CST3;CST4       | a | 0.069  | 0.005 | 2.42E-38 | 12,266 |
| rs726217   | 20 | 23532116 | CST9 | CST3;CST9L;CST9      | a | -0.036 | 0.003 | 4.58E-31 | 12,266 |
| rs2983640  | 20 | 23534360 | CST9 | CST3;CST9L;CST9      | a | -0.036 | 0.003 | 5.65E-31 | 12,266 |
| rs2983636  | 20 | 23530023 |      | CST3;CST9L;CST9      | a | -0.036 | 0.003 | 1.53E-30 | 12,266 |
| rs2093145  | 20 | 23527283 |      | CST3;CST9L;CST9      | t | 0.036  | 0.003 | 2.71E-30 | 12,266 |
| rs2983644  | 20 | 23540966 |      | CST3;CST9L;CST9      | a | -0.036 | 0.003 | 6.07E-30 | 12,266 |
| rs2424577  | 20 | 23561750 |      | CST3;CST4;CST9       | a | -0.037 | 0.003 | 6.07E-30 | 12,266 |
| rs2424576  | 20 | 23558881 |      | CST3;CST4;CST9       | t | -0.037 | 0.003 | 6.44E-30 | 12,266 |
| rs2424574  | 20 | 23556980 |      | CST3;CST9L;CST4;CST9 | t | -0.037 | 0.003 | 7.03E-30 | 12,266 |
| rs2104006  | 20 | 23555874 |      | CST3;CST9L;CST4;CST9 | t | 0.036  | 0.003 | 8.42E-30 | 12,266 |
| rs911122   | 20 | 23573746 |      | CST3;CST4;CST9       | a | -0.032 | 0.003 | 3.19E-25 | 12,266 |
| rs4611705  | 20 | 23688147 |      | CST1                 | a | -0.062 | 0.006 | 3.81E-25 | 12,266 |
| rs8123349  | 20 | 23584830 |      | CST3;CST4;CST9       | a | 0.051  | 0.005 | 8.73E-25 | 12,266 |
| rs2180663  | 20 | 23581617 |      | CST3;CST4;CST9       | c | -0.033 | 0.003 | 9.60E-25 | 12,266 |
| rs16985615 | 20 | 23590427 |      | CST3;CST4;CST9       | t | 0.050  | 0.005 | 2.97E-24 | 12,266 |
| rs8117359  | 20 | 23593826 |      | CST3;CST4;CST9       | c | 0.050  | 0.005 | 3.89E-24 | 12,266 |
| rs4815205  | 20 | 23465989 |      | CST9L;CST8           | a | -0.050 | 0.006 | 4.58E-20 | 12,266 |
| rs3761285  | 20 | 23618480 |      | CST1;CST3;CST4       | t | 0.042  | 0.005 | 1.17E-19 | 12,266 |
| rs11907623 | 20 | 23436080 |      | CST9L;CST8;CST11     | t | 0.048  | 0.005 | 5.62E-19 | 12,266 |
| rs11907129 | 20 | 23435731 |      | CST9L;CST8;CST11     | a | -0.048 | 0.005 | 5.69E-19 | 12,266 |
| rs6048998  | 20 | 23621915 |      | CST1;CST3;CST4       | a | 0.033  | 0.004 | 5.52E-18 | 12,266 |
| rs6049003  | 20 | 23625829 |      | CST1;CST3;CST4       | t | -0.031 | 0.004 | 1.31E-17 | 12,266 |
| rs2224219  | 20 | 23422808 | CST8 | CSTL1;CST8;CST11     | t | 0.043  | 0.005 | 9.63E-16 | 12,266 |

|            |    |          |      |                  |   |        |       |          |        |
|------------|----|----------|------|------------------|---|--------|-------|----------|--------|
| rs2273378  | 20 | 23424389 | CST8 | CSTL1;CST8;CST11 | a | -0.043 | 0.005 | 9.97E-16 | 12,266 |
| rs7264999  | 20 | 23621897 |      | CST1;CST3;CST4   | a | -0.039 | 0.005 | 7.16E-15 | 12,266 |
| rs7271100  | 20 | 23624624 |      | CST1;CST3;CST4   | a | -0.038 | 0.005 | 1.34E-14 | 12,266 |
| rs6515382  | 20 | 23628056 |      | CST1;CST4        | a | -0.038 | 0.005 | 1.97E-14 | 12,266 |
| rs7270028  | 20 | 23629073 |      | CST1;CST4        | a | -0.038 | 0.005 | 1.98E-14 | 12,266 |
| rs7263120  | 20 | 23638021 |      | CST1;CST4        | t | -0.038 | 0.005 | 2.52E-14 | 12,266 |
| rs7263473  | 20 | 23638467 |      | CST1;CST4        | a | -0.039 | 0.005 | 2.63E-14 | 12,266 |
| rs2424592  | 20 | 23586021 |      | CST3;CST4;CST9   | t | -0.025 | 0.003 | 3.62E-13 | 12,266 |
| rs8123755  | 20 | 23630133 |      | CST1;CST4        | a | 0.035  | 0.005 | 5.61E-13 | 12,266 |
| rs2424596  | 20 | 23593518 |      | CST3;CST4;CST9   | a | -0.025 | 0.003 | 7.92E-13 | 12,266 |
| rs13041159 | 20 | 23657627 |      | CST1;CST4        | a | 0.038  | 0.005 | 1.06E-12 | 12,266 |
| rs8121173  | 20 | 23674948 |      | CST1;CST4        | t | 0.038  | 0.005 | 2.91E-12 | 12,266 |
| rs8114437  | 20 | 23674888 |      | CST1;CST4        | t | -0.038 | 0.005 | 2.92E-12 | 12,266 |
| rs238668   | 20 | 23438123 |      | CST9L;CST8;CST11 | a | 0.021  | 0.003 | 2.93E-12 | 12,266 |
| rs2983303  | 20 | 23437197 |      | CST9L;CST8;CST11 | t | 0.021  | 0.003 | 2.96E-12 | 12,266 |
| rs2983302  | 20 | 23436418 |      | CST9L;CST8;CST11 | t | 0.021  | 0.003 | 3.05E-12 | 12,266 |
| rs8115789  | 20 | 23675039 |      | CST1;CST4        | t | -0.038 | 0.005 | 3.16E-12 | 12,266 |
| rs8115901  | 20 | 23675241 |      | CST1;CST4        | t | -0.038 | 0.006 | 3.41E-12 | 12,266 |
| rs8115868  | 20 | 23675291 |      | CST1;CST4        | a | 0.038  | 0.006 | 3.61E-12 | 12,266 |
| rs4331584  | 20 | 23675735 |      | CST1;CST4        | a | -0.038 | 0.006 | 3.72E-12 | 12,266 |
| rs3004118  | 20 | 23435503 |      | CST9L;CST8;CST11 | t | -0.021 | 0.003 | 3.75E-12 | 12,266 |
| rs6138058  | 20 | 23694203 |      | CST2;CST1        | a | -0.025 | 0.004 | 4.92E-12 | 12,266 |
| rs6036492  | 20 | 23650171 |      | CST1;CST4        | a | 0.021  | 0.003 | 3.44E-11 | 12,266 |
| rs3004119  | 20 | 23437678 |      | CST9L;CST8;CST11 | t | -0.020 | 0.003 | 5.89E-11 | 12,266 |
| rs6106691  | 20 | 23543741 |      | CST3;CST9L;CST9  | a | -0.026 | 0.004 | 1.22E-10 | 12,266 |
| rs6036464  | 20 | 23531023 |      | CST3;CST9L;CST9  | t | -0.026 | 0.004 | 1.44E-10 | 12,266 |
| rs6106689  | 20 | 23539463 |      | CST3;CST9L;CST9  | a | -0.026 | 0.004 | 1.49E-10 | 12,266 |
| rs10485646 | 20 | 23540543 |      | CST3;CST9L;CST9  | t | -0.026 | 0.004 | 1.51E-10 | 12,266 |
| rs2983641  | 20 | 23534977 |      | CST3;CST9L;CST9  | t | -0.026 | 0.004 | 1.65E-10 | 12,266 |

|            |    |          |      |                 |   |        |       |          |        |
|------------|----|----------|------|-----------------|---|--------|-------|----------|--------|
| rs6048927  | 20 | 23529234 |      | CST3;CST9L;CST9 | a | 0.026  | 0.004 | 1.66E-10 | 12,266 |
| rs2983639  | 20 | 23534184 | CST9 | CST3;CST9L;CST9 | t | -0.026 | 0.004 | 2.38E-10 | 12,266 |
| rs11907773 | 20 | 23642711 |      | CST1;CST4       | t | -0.028 | 0.005 | 4.06E-10 | 12,266 |
| rs11907747 | 20 | 23642762 |      | CST1;CST4       | t | -0.028 | 0.005 | 4.17E-10 | 12,266 |
| rs6114234  | 20 | 23640725 |      | CST1;CST4       | a | -0.021 | 0.003 | 4.19E-10 | 12,266 |
| rs6114235  | 20 | 23640973 |      | CST1;CST4       | a | 0.020  | 0.003 | 4.37E-10 | 12,266 |
| rs13044242 | 20 | 23647253 |      | CST1;CST4       | c | -0.028 | 0.005 | 4.52E-10 | 12,266 |
| rs7266357  | 20 | 23648824 |      | CST1;CST4       | t | 0.028  | 0.005 | 4.99E-10 | 12,266 |
| rs4378870  | 20 | 23647433 |      | CST1;CST4       | a | 0.028  | 0.005 | 5.76E-10 | 12,266 |
| rs2424599  | 20 | 23597463 |      | CST3;CST4       | t | 0.025  | 0.004 | 6.29E-10 | 12,266 |
| rs947010   | 20 | 23626890 |      | CST1;CST4       | a | 0.019  | 0.003 | 8.51E-10 | 12,266 |
| rs6049010  | 20 | 23640919 |      | CST1;CST4       | t | 0.020  | 0.003 | 1.00E-09 | 12,266 |
| rs6114230  | 20 | 23633804 |      | CST1;CST4       | a | 0.019  | 0.003 | 1.00E-09 | 12,266 |
| rs6076119  | 20 | 23643459 |      | CST1;CST4       | a | 0.020  | 0.003 | 1.03E-09 | 12,266 |
| rs6114237  | 20 | 23647223 |      | CST1;CST4       | a | 0.020  | 0.003 | 1.07E-09 | 12,266 |
| rs6049097  | 20 | 23701552 |      | CST2;CST1       | t | 0.020  | 0.003 | 1.35E-09 | 12,266 |
| rs6114275  | 20 | 23701925 |      | CST2;CST1       | a | 0.023  | 0.004 | 3.30E-09 | 12,266 |
| rs6048991  | 20 | 23614934 | CST4 | CST3;CST4       | t | -0.026 | 0.004 | 3.71E-09 | 12,266 |
| rs6106719  | 20 | 23725924 |      | CST2;CST1       | a | -0.022 | 0.004 | 3.77E-09 | 12,266 |
| rs6132653  | 20 | 23652288 |      | CST1;CST4       | a | 0.019  | 0.003 | 4.07E-09 | 12,266 |
| rs4328700  | 20 | 23657545 |      | CST1;CST4       | a | -0.019 | 0.003 | 4.07E-09 | 12,266 |
| rs3004126  | 20 | 23472229 |      | CST9L;CST9;CST8 | a | -0.026 | 0.004 | 4.13E-09 | 12,266 |
| rs6114319  | 20 | 23753520 | CST2 | CST2;CST5       | c | -0.023 | 0.004 | 4.42E-09 | 12,266 |
| rs6138046  | 20 | 23652388 |      | CST1;CST4       | c | 0.019  | 0.003 | 4.51E-09 | 12,266 |
| rs6114303  | 20 | 23738008 |      | CST2;CST1       | t | -0.022 | 0.004 | 4.70E-09 | 12,266 |
| rs6114308  | 20 | 23740498 |      | CST2            | c | -0.022 | 0.004 | 5.03E-09 | 12,266 |
| rs6106724  | 20 | 23744154 |      | CST2            | t | 0.022  | 0.004 | 5.14E-09 | 12,266 |
| rs6114318  | 20 | 23751966 |      | CST2;CST5       | a | 0.022  | 0.004 | 5.34E-09 | 12,266 |
| rs6048993  | 20 | 23615657 | CST4 | CST3;CST4       | a | 0.026  | 0.004 | 5.49E-09 | 12,266 |

|            |    |          |      |                         |   |        |       |          |        |
|------------|----|----------|------|-------------------------|---|--------|-------|----------|--------|
| rs8119679  | 20 | 23670593 |      | CST1;CST4               | a | 0.027  | 0.005 | 5.98E-09 | 12,266 |
| rs8124057  | 20 | 23667928 |      | CST1;CST4               | c | 0.027  | 0.005 | 6.71E-09 | 12,266 |
| rs6114273  | 20 | 23699715 |      | CST2;CST1               | a | 0.022  | 0.004 | 7.66E-09 | 12,266 |
| rs10854252 | 20 | 23617305 | CST4 | CST1;CST3;CST4          | c | 0.026  | 0.004 | 7.85E-09 | 12,266 |
| rs12329441 | 20 | 23698897 |      | CST2;CST1               | a | 0.022  | 0.004 | 7.98E-09 | 12,266 |
| rs3004148  | 20 | 23541829 |      | CST3;CST9L;CST9         | t | 0.023  | 0.004 | 8.15E-09 | 12,266 |
| rs6138047  | 20 | 23655717 |      | CST1;CST4               | t | 0.018  | 0.003 | 9.66E-09 | 12,266 |
| rs6138054  | 20 | 23670020 |      | CST1;CST4               | a | 0.018  | 0.003 | 9.81E-09 | 12,266 |
| rs6049048  | 20 | 23670319 |      | CST1;CST4               | t | -0.018 | 0.003 | 9.87E-09 | 12,266 |
| rs6049064  | 20 | 23675145 |      | CST1;CST4               | t | 0.019  | 0.003 | 1.04E-08 | 12,266 |
| rs4375938  | 20 | 23697636 |      | CST2;CST1               | a | 0.022  | 0.004 | 1.09E-08 | 12,266 |
| rs6049065  | 20 | 23675254 |      | CST1;CST4               | t | 0.019  | 0.003 | 1.15E-08 | 12,266 |
| rs6049062  | 20 | 23674957 |      | CST1;CST4               | t | 0.018  | 0.003 | 1.29E-08 | 12,266 |
| rs3761286  | 20 | 23619740 |      | CST1;CST3;CST4          | a | -0.025 | 0.005 | 1.44E-08 | 12,266 |
| rs4303784  | 20 | 23662820 |      | CST1;CST4               | t | -0.018 | 0.003 | 1.62E-08 | 12,266 |
| rs7273134  | 20 | 23678479 | CST1 | CST1                    | c | 0.019  | 0.003 | 1.64E-08 | 12,266 |
| rs6114315  | 20 | 23750073 |      | CST2;CST5               | t | 0.022  | 0.004 | 3.64E-08 | 12,266 |
| rs1731274  | 8  | 23822264 |      | STC1                    | a | 0.017  | 0.003 | 4.64E-08 | 12,266 |
| rs2983544  | 20 | 23849446 |      | CST5                    | a | -0.062 | 0.011 | 4.77E-08 | 12,266 |
| rs819196   | 8  | 23798666 |      | STC1                    | a | 0.017  | 0.003 | 7.18E-08 | 12,266 |
| rs1705699  | 8  | 23837398 |      |                         | t | 0.017  | 0.003 | 9.73E-08 | 12,266 |
| rs6083269  | 20 | 23733807 |      | CST2;CST1               | a | -0.017 | 0.003 | 1.43E-07 | 12,266 |
| rs12917707 | 16 | 20275191 |      | FLJ20581;UMOD;GP2;PDILT | t | 0.021  | 0.004 | 2.00E-07 | 12,266 |
| rs12922822 | 16 | 20275146 |      | FLJ20581;UMOD;GP2;PDILT | t | 0.021  | 0.004 | 2.09E-07 | 12,266 |
| rs13333226 | 16 | 20273155 |      | FLJ20581;UMOD;GP2;PDILT | a | -0.020 | 0.004 | 2.60E-07 | 12,266 |
| rs4871907  | 8  | 23842729 |      |                         | a | 0.017  | 0.003 | 2.71E-07 | 12,266 |
| rs4293393  | 16 | 20272089 |      | FLJ20581;UMOD;GP2;PDILT | a | -0.020 | 0.004 | 2.85E-07 | 12,266 |
| rs13329952 | 16 | 20274008 |      | FLJ20581;UMOD;GP2;PDILT | t | -0.020 | 0.004 | 3.04E-07 | 12,266 |
| rs13036932 | 20 | 23586306 |      | CST3;CST4;CST9          | t | 0.036  | 0.007 | 3.49E-07 | 12,266 |

[illegible]

Supplementary Figure 1: Quantile-Quantile Plots of expected vs. observed  $-\log_{10}(\text{P-value})$  for CKD (A), eGFRcrea (B), and eGFRcys (C) in the discovery samples.

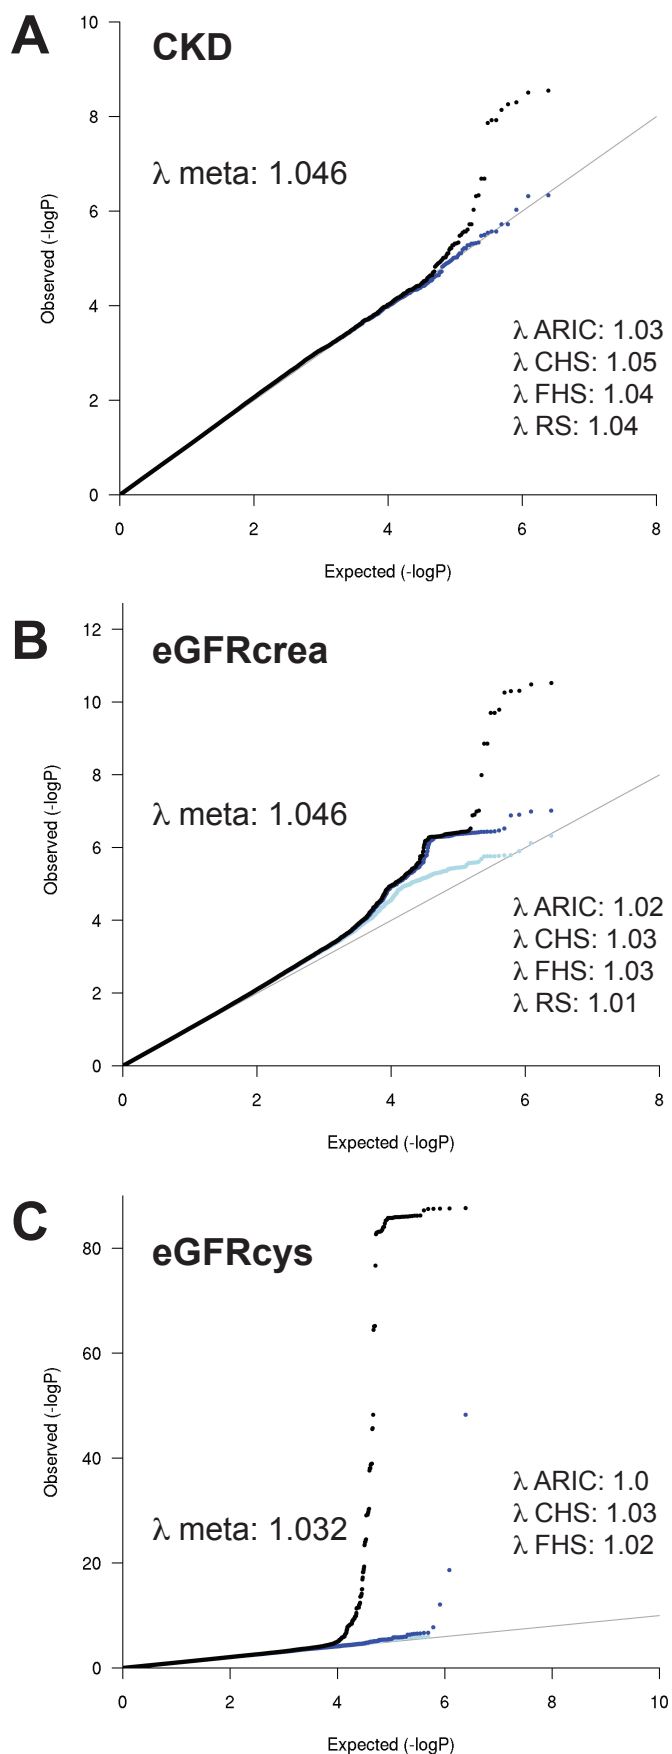

Genomic control factors ( $\lambda$ ) were calculated within study and after meta-analysis. Color coding: black: all SNPs, dark blue: after removal of associations with  $p < 5 \times 10^{-8}$ , light blue: after removal of associations with  $p < 4 \times 10^{-7}$ .

Supplementary Figure 2: Genetic architecture of the genome-wide significant susceptibility locus for eGFR<sub>crea</sub> in the *JAG1* region in the discovery samples.

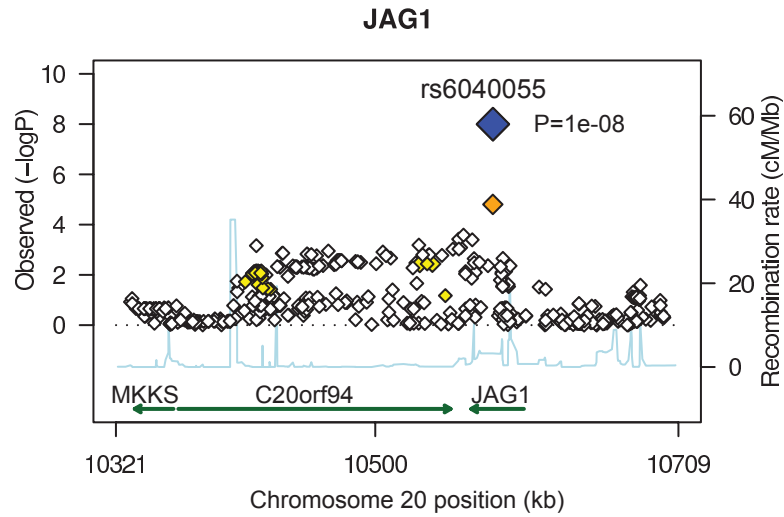

( $-\log_{10}$  P-values) are plotted versus genomic position (Build 36). The most significant SNP in the region is plotted in blue. LD based on the HapMap CEU sample is color-coded: red ( $r^2$  to top SNP 0.8-1.0), orange (0.5-0.8), yellow (0.2-0.5), and white ( $<0.2$ ). Gene annotations are based on Build 36 and arrows present direction of transcription.
